# Supplementary material for: Expression and Transcript Localization of star, sf-1, and dax-1 in the Early Brain of the Orange-Spotted Grouper Epinephelus coioides
Source: MDPI journal article supplement (doi:10.3390/ijms23052614), 2022-02-27
Supplement: s1 [file s1]

|                |       |                                                                                                                                                                      |
|----------------|-------|----------------------------------------------------------------------------------------------------------------------------------------------------------------------|
| <b>GR-star</b> | (1)   | --PATFKLCAGISYRHMNRMTGLRKNALVAIHHELNRLAGPGPSNWISQVHRRSSLLSSR                                                                                                         |
| JSB-star       | (1)   | MLPATFKLCAGISYRHMNRMTGLRKNAMVAIHHELNRLAGPGPSNWISQVRRRSSLLSSR                                                                                                         |
| JA-star        | (1)   | MLPATFKLCAGISYRHMNRMTGLRKNAMVAIHHELNRLAGPGPSNWISQVRRRSSLLSSR                                                                                                         |
| GSB-star       | (1)   | MLPATFKLCAGISYRHMNRMTGLRKNAMVAIHHELNRLAGPGPSNWISQVRRRSSLLSSR                                                                                                         |
| LMB-star       | (1)   | MLPATFKLCAGISYRHMNRMTGLRKNAMVAIHHELNRLAGPGPSNWISQVRRRSSLLSSR                                                                                                         |
| AC-star        | (1)   | MLPTTFKLCAGISYRHMNRMTGLRKNAMVAIHHELNRLAGPGSSNWISQVRRRSSFLGAR                                                                                                         |
| ZFH-star       | (1)   | MLPATFKLCAGISYRHMNRMTGLRKNAMIAIHHELNLKLSGPGASTWINHIRRSSLLSSP<br>* . ***** . ***** . * : * * . : * . * * : . . . ***** . * . . .                                      |
| <b>GR-star</b> | (59)  | IEEEQRYSEEEMSIVKQGENALQKAINILGEQDGTIETVAANGDKVLSKVLDPDIGKVF                                                                                                          |
| JSB-star       | (61)  | IEEEKGYNEEEMSIVKQGEDALQKAISILSEQDGTIETVAANGDKVLSKMLPDIGKVF                                                                                                           |
| JA-star        | (61)  | IKKEEDGYSEEEMSIVKQGEDALQKAIGILSEQDGTIETVAANGDKVLSKVLDPVGKVF                                                                                                          |
| GSB-star       | (61)  | IREVEGYSEAEMSIVKQGEDALQKAISILSEQDGTIETVAANGDKVLSKTLDPDIGKVF                                                                                                          |
| LMB-star       | (61)  | IEEEEGYSDEEMSIVKQGEDALQKAISILSDQDGTTEIVAANGDKVLSKMLPDIGKVF                                                                                                           |
| AC-star        | (61)  | IEEEQGYSEQEMSIVKQGEDALQKAISILSEQDGTLETVAANGDKVLSKMLPDIGKVF                                                                                                           |
| ZFH-star       | (61)  | IAEET-YSEADQCYVQQQGEALQKSISILEDQDGTQTEIESINGEKVMSKVLPGIGKVF<br>* * . * . . . . * * . * * . * * . * : * * . : * * * . : * : . . . * * . * * . * * * . : * * * * *     |
| <b>GR-star</b> | (119) | LEVMLEQHPDLYEELVGNMEQMGEWNPVVKQVKILQKIGQDTMTHEVSAETPGNVVGP                                                                                                           |
| JSB-star       | (121) | LEVMLEQHPDLYEELVGNMEQMGEWNPVKKVKILQKIGQDTMTHEVSAETPGNVVGP                                                                                                            |
| JA-star        | (121) | LEVMLEQHPENLYEELVGKMEQMGEWNPVVKQVKILQKIGQDTMTHEVSAETPGNVVGP                                                                                                          |
| GSB-star       | (121) | LEVMLEQHPDLYEELVGNMEQMGEWNPVVKQVKILQKIGQDTMTHEVSAETPGNVVGP                                                                                                           |
| LMB-star       | (121) | LEVMLEQRPDLYKELVGNMEQMGEWNPVVKQVKILQKIGQDTMTHEVSAETPGNVVGP                                                                                                           |
| AC-star        | (121) | LEVMLEQHPDLYEELVGNMEQMGEWNPVVKQVKILQKIGKETMTHEVSAETPGNVVGP                                                                                                           |
| ZFH-star       | (121) | LEVTLQQTGDLYDELVDNMEQMGEWNPVVKQVKILQKIGQETMITHEISAETPGNVVGP<br>* * . * * . : . : * * . * * . : * * * . * * * * . * * * * * . : * * . * * . * * * * * * * * *         |
| <b>GR-star</b> | (179) | RDLVSVRCAKRRGSTCFLAGMSTQHAKMPEQRGVVRAENGPTCIVMKPCAEDPNKTKFTW                                                                                                         |
| JSB-star       | (181) | RDFVSVRCAKRRGSTCFLAGMSTQHPKMPEQRGVIRAENGPTCIVMKPCAEDPNKTKFTW                                                                                                         |
| JA-star        | (181) | RDFVSVRCAKRRGSTCFLAGMSTQHPRMPEQRGVVRAENGPTCIVMKPCAEDPNKTKFTW                                                                                                         |
| GSB-star       | (181) | RDFVSVRCAKRRGSTCFLAGMSTQHPKMPEQRGVVRAENGPTCIVMKPCAEDPNKTKFTW                                                                                                         |
| LMB-star       | (181) | RDFVSVRCAKRRGSTCFLAGMSTQHPKMPEQRGVVRAENGPTCIVMKPCVEDPNKTKFTW                                                                                                         |
| AC-star        | (181) | RDFVSVRCAKRRGSTCFLAGMSTKHPTMPEQRGVVRAENGPTCIVLKPCAEDPNKTKFTW                                                                                                         |
| ZFH-star       | (181) | RDFVNVRAKRRGSTCFLAGMSTQHPGMPEQKGFVRAENGPTCIVMRPSADDPNKTKFTW<br>* * . * . * * . * * * * * * * * * . * . : * * * . * . . * * * * * * * . : * * . * * . * * * * * * * * |
| <b>GR-star</b> | (239) | LLSIDLKGWIPKTIINKVLSQTQV-----                                                                                                                                        |
| JSB-star       | (241) | LLNIDLKGWIPKTIINKVLSQTQVDFANHLRQRMANNVSMEMAHAC                                                                                                                       |
| JA-star        | (241) | LLSIDLKGWIPKTIINKVLSQTQVDFANHLRQRMANNVSMEMAHAC                                                                                                                       |
| GSB-star       | (241) | LLNIDLKGWIPKTIINKVLSQTQVDFANHLRQRMANNVSMEMAHAC                                                                                                                       |
| LMB-star       | (241) | LLNIDLKGWIPKTIINKVLSQTQVDFANHLRQRMANNVSMEMAHAC                                                                                                                       |
| AC-star        | (241) | LLNIDLKGWIPKTIINKVLFQTQVDFASHLRQMAHNVFMEMAHAC                                                                                                                        |
| ZFH-star       | (241) | LLSLDLKGWIPKTVINRVLSQTQVDFVNHLRDRMASGGGIDAIAIC<br>* * : . * * * * * * * : * . : * * . * * *                                                                          |

**Figure S1.**

|               |       |                                                               |
|---------------|-------|---------------------------------------------------------------|
| <b>GR-Sf1</b> | (1)   | -----                                                         |
| JF-Sf1        | (1)   | MLPKVETESLGLSRSYGEHRHMPRIMQAPQIKMMDYSYDEDLDEMCPVCGDKVSGYHYGL  |
| ESB-Sf1       | (1)   | MLPKVETESLGLSRSYGEQGHMPRNMQAPQLKMDYSYDEDLDEMCPVCGDKVSGYHYGL   |
| LMB-Sf1       | (1)   | -----MMDYSYDEDLDEMCPVCGDKVSGYHYGL                             |
| BP-Sf1        | (1)   | MLPKVETESLGLARSYGEQGHMPRNMQAHQLKMDYSYDEDLDEMCPVCGDKVSGYHYGL   |
| OH-Sf1        | (1)   | -----MMDYSYDEDLDEMCPVCGDKVSGYHYGL                             |
| ZFH-Sf1       | (1)   | MLPKVESEYLGLARSHGEQGHMPGNMQAPQFKMMDYSYDEDLDEMCPVCGDKVSGYHYGL  |
|               |       |                                                               |
| <b>GR-Sf1</b> | (1)   | --ESCKGFFKRTVQNNKRYTCIENQSCQIDKTQRKRCPYCRFQKCLTVGMKLEAVRADR   |
| JF-Sf1        | (61)  | LTCECKGFFKRTVQNNKRYTCIENQSCQIDKTQRKRCPYCRFQKCLTVGMKLEAVRADR   |
| ESB-Sf1       | (61)  | LTCECKGFFKRTVQNNKRYTCIENQSCQIDKTQRKRCPYCRFQKCLTVGMKLEAVRADR   |
| LMB-Sf1       | (29)  | LTCECKGFFKRTVQNNKRYTCIENQSCQIDKTQRKRCPYCRFQKCLTVGMKLEAVRADR   |
| BP-Sf1        | (61)  | LTCECKGFFKRTVQNNKRYTCIENQSCQIDKTQRKRCPYCRFQKCLTVGMKLEAVRADR   |
| OH-Sf1        | (29)  | LTCECKGFFKRTVQNNKRYTCIENQSCQIDKTQRKRCPYCRFQKCLTVGMKLEAVRADR   |
| ZFH-Sf1       | (61)  | LTCECKGFFKRTVQNNKRYTCIENQSCQIDKTQRKRCPYCRFQKCLTVGMKLEAVRADR   |
|               |       | *****                                                         |
|               |       |                                                               |
| <b>GR-Sf1</b> | (58)  | MRGGRNKFGPMYKRDRAKQKKALIRANGLKIEAMSQVMQAVPTDLTISSAIQNIHSAA    |
| JF-Sf1        | (121) | MRGGRNKFGPMYKRDRAKQKKALIRANGLKIEAMTQVMQAVPTDLTISSAIQNIHSAA    |
| ESB-Sf1       | (121) | MRGGRNKFGPMYKRDRAKQKKALIRANGLKIEAMTQVMQAVPTDLTISSAIQNIHSAA    |
| LMB-Sf1       | (89)  | MRGGRNKFGPMYKRDRAKQKKALIRANGLKIEAMTQVMQAVPTDLTISSAIQNIHSAA    |
| BP-Sf1        | (121) | MRGGRNKFGPMYKRDRAKQKKALIRANGLKIEAMTQVMQAVPTDLTISSAIQNIHSAA    |
| OH-Sf1        | (89)  | MRGGRNKFGPMYKRDRAKQKKALIRANGLKIEAMSQVMQAVPTDLTISSAIQNIHSAA    |
| ZFH-Sf1       | (121) | MRGGRNKFGPMYKRDRAKQKKALIRANGLKIEAMTQVMQAVPTDLTISSAIQNIHSAS    |
|               |       | *****.***.***.***.***.*****.                                  |
|               |       |                                                               |
| <b>GR-Sf1</b> | (118) | SKGLPLSHHPGHHTG---HHHHHHHHHATALPPTYDRSPFVTSFVSMAMPPHAGSLQGYQ  |
| JF-Sf1        | (181) | SKGLPLSHHAGHHTG-HHHHHHHHHHATALPPTYDRSPFVTSFVSMAMPPHAGSLQGYQ   |
| ESB-Sf1       | (181) | SKGLPLSHHAGHHTG-HHHHHHHHHHATALPPTYDRSPFVTSFVSMAMPPHAGSLQGYQ   |
| LMB-Sf1       | (149) | SKGLPLSHHPGHHTG-HHHHHHHHHHATALPPTYDRSPFVTSFVSMAMPPHAGSLQGYQ   |
| BP-Sf1        | (181) | SKGLPLSHHTGHHAG-HHHHHHHHHHATALPPTYDRSPFVTSFVSMAMPPHAGSLQGYQ   |
| OH-Sf1        | (149) | SKGLPLSHHAGHHTGHHHHHHHHHYHHATALPPTYDRSPFVTSFVSMAMPPHAGCLQGYQ  |
| ZFH-Sf1       | (181) | KG----LPLSHHHHHHHHHSSSAGLPPADFDSPFVTSFVSMAMPPHAGGLQGYQ        |
|               |       | .. ..*... *****:.....*.*.*****:*****                          |
|               |       |                                                               |
| <b>GR-Sf1</b> | (175) | AAYGHFQGTRTIKSEYP-----                                        |
| JF-Sf1        | (240) | AAYGHFQGTRTIKSEYPDPYTSSPESIMGYAYVDAYQSGSPPSFPHLIVELLKCEPDEPQ  |
| ESB-Sf1       | (240) | AAYGHFQGTRTIKSEYPDPYTSSPESIMGYAYVDAYQSGSPPSFPHLIVELLKCEPDEPQ  |
| LMB-Sf1       | (208) | AAYGHFQGTRTIKSEYPDPYTSSPESIMGYAYVDAYQSGSPPSFPHLIVELLKCEPDEPQ  |
| BP-Sf1        | (240) | AAYGHFQGTRTIKSEYPDPYTSSPESIMGYAYVDAYQSGSPPSFPHLIVELLKCEPDEPQ  |
| OH-Sf1        | (209) | AAYGHFQGTRTINFEYPDPYTSSPESIMGYAYVDAYQSGSPPSFPHLIVELLKCEPDEPQ  |
| ZFH-Sf1       | (236) | AYG--HFQSRTIKSEYPDPYTSSPESLMGYPYVEAYAGGSPPSFPHLIVELLKCEPDEPQ  |
|               |       | *.. ....***.***                                               |
|               |       |                                                               |
| <b>GR-Sf1</b> | (191) | -----                                                         |
| JF-Sf1        | (300) | VQAKILAYLQQEQASRGKHEKLNTFGLMCKMADQTLFSIVEWARSSIFFRELKVDDQMKL  |
| ESB-Sf1       | (300) | VQAKILAYLQQEQASRGKHEKLNTFGLMCKMADQTLFSIVEWARSSIFFRELKVDDQMKL  |
| LMB-Sf1       | (268) | VQAKILAYLQQEQASRGKHEKLNTFGLMCKMADQTLFSIVEWARSSIFFRELKVDDQMKL  |
| BP-Sf1        | (300) | VQAKILAYLQQEQASRGKHEKLNTFGLMCKMADQTLFSIVEWARSSIFFRELKVDDQMKL  |
| OH-Sf1        | (269) | VQAKILAYLQQEQASRGKHEKLNTFGLMCKMADQTLFSIVEWARSSIFFRELKVDDQMKL  |
| ZFH-Sf1       | (294) | VQAKILAYLQQEQASRGKHEKLNTFGLMCKMADQTLFSIVEWARSSIFFRELKVDDQMKL  |
|               |       |                                                               |
| <b>GR-Sf1</b> | (191) | -----                                                         |
| JF-Sf1        | (360) | LQNCWSELLILDHVFRQVVHAKESILLVTGQQVDYAVIASQAGATLNNLLSHAQELVAK   |
| ESB-Sf1       | (360) | LQNCWSELLILDHVFRQVVHAKESILLVTGQQVDYAVIASQAGATLNNLLSHAQELVKG   |
| LMB-Sf1       | (328) | LQNCWSELLILDHVFRQVVHAKESILLVTGQQVDYAVIASQAGATLNNLLSHAQELVAK   |
| BP-Sf1        | (360) | LQNCWSELLILDHVFRQVVHAKESILLVTGQQVDYAVIASQAGATLNNLLSHAQELVAK   |
| OH-Sf1        | (329) | LQNCWSELLILDHVFRQVVHAKESILLVTGQQVDYAMIASQAGATLNNLLSHAQELVTR   |
| ZFH-Sf1       | (354) | LQNCWSELLILDHVFRQVMHAKESILLVTGQQVDYALIASQAGATLNNLLSHAQELVSK   |
|               |       |                                                               |
| <b>GR-Sf1</b> | (191) | -----                                                         |
| JF-Sf1        | (420) | LRSLQLDQREFVCLKFLVLVFLSLDVKNLENFHLVESVQEQVNAALLDYVMCNPQQTDKFG |
| ESB-Sf1       | (420) | LRSLQLDQREFVCLKFLVLVFLSLDVKNLENFHLVESVQEQVNAALLDYVMCNPQQTDKFG |
| LMB-Sf1       | (388) | LRSLQLDQREFVCLKFLVLVFLSLDVKNLENFHLVESVQEQVNAALLDYVMCNPQQTDKFG |
| BP-Sf1        | (420) | LRSLQLDQREFVCLKFLVLVFLSLDVKNLENFHLVESVQEQVNAALLDYVMCNPQQTDKFG |
| OH-Sf1        | (389) | LRSLQLDQREFVCLKFLVLVFLSLDVKNLENFHLVESVQEQVNAALLDYVMCNPQQTDKFG |
| ZFH-Sf1       | (414) | LRSLQLDQREFVCLKFLVLVFLSLDVKNLENFHLVESVQEQVNAALLDYVMCNPQQTDKFG |
|               |       |                                                               |
| <b>GR-Sf1</b> | (191) | -----                                                         |
| JF-Sf1        | (480) | QLLLRLPEIRAIISLQAEELYKHLNGDVPCNNLLIEMLHAKRA                   |
| ESB-Sf1       | (480) | QLLLRLPEIRAIISLQAEELYKHLNGDVPCNNLLIEMLHAKRA                   |
| LMB-Sf1       | (448) | QLLLRLPEIRAIISLQAEELYKHLNGDVPCNNLLIEMLHAKRA                   |
| BP-Sf1        | (480) | QLLLRLPEIRAIISLQAEELYKHLNGDVPCNNLLIEMLHA---                   |
| OH-Sf1        | (449) | QLLLRLPEIRAIISLQAEELYKHLNGDVPCNNLLIEMLHAKRA                   |
| ZFH-Sf1       | (474) | QLLLRLPEIRAIISLQAEELYKHLNGDVPCNNLLIEMLHAKRA                   |

Figure S2.



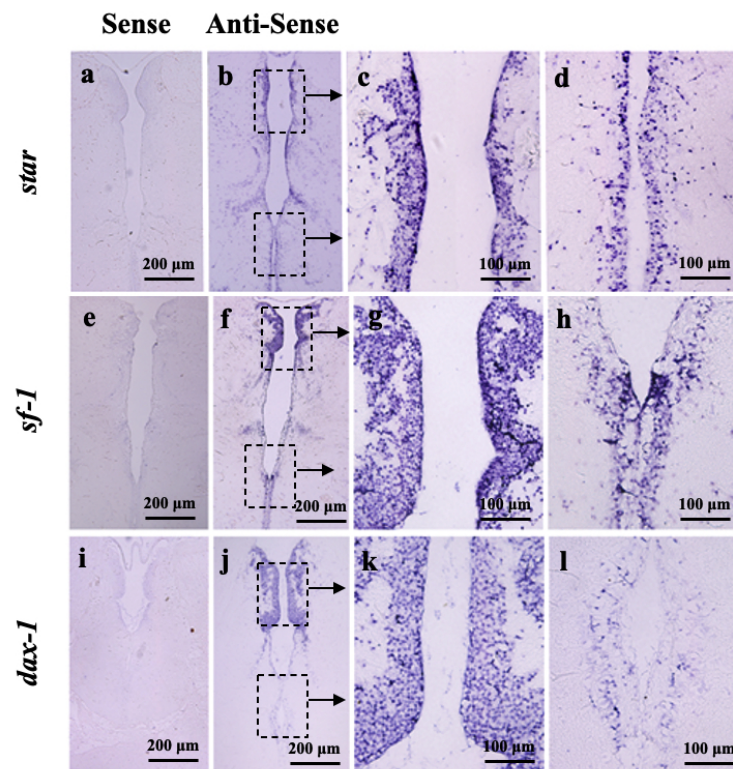

**Figure S4.**



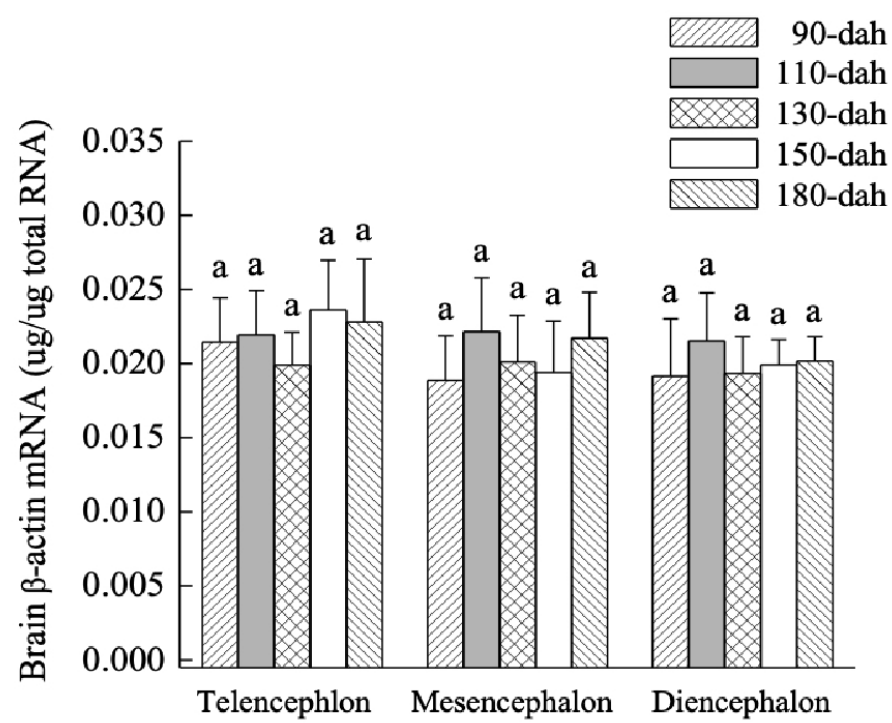

**Figure S5.**
